# Supplementary material for: Cu/MoS2/ITO based hybrid structure for catalysis of hydrazine oxidation
Source: Royal Society of Chemistry journal article supplement (doi:10.1039/c4ra14048f), 2015-01-01
Supplement: c4ra14048f1.pdf [file c4ra14048f1.pdf]

## Cu-MoS<sub>2</sub>-ITO based hybrid structures for catalysis of hydrazine oxidation

Sajjad Hussain<sup>a,b</sup>, Kamran Akbar<sup>c</sup>, Dhanasekaran Vikraman<sup>a,b</sup>, Muhmmad Arslan shehzad<sup>a,b</sup>,  
Seung Ho Jung<sup>c</sup>, Yongho Seo<sup>a,b</sup>, and Jongwan Jung<sup>\*a,b</sup>

<sup>a</sup> Graphene Research Institute, Sejong University, Seoul 143-747, Republic of Korea

<sup>b</sup> Institute of Nano and Advanced Materials Engineering, Sejong University, Seoul 143-747, Republic of Korea

<sup>c</sup> Centre for Biotechnology Research in UBITA (CBRU), Dept. of Bioscience and Biotechnology, Konkuk University, Seoul 143-701, Republic of Korea.

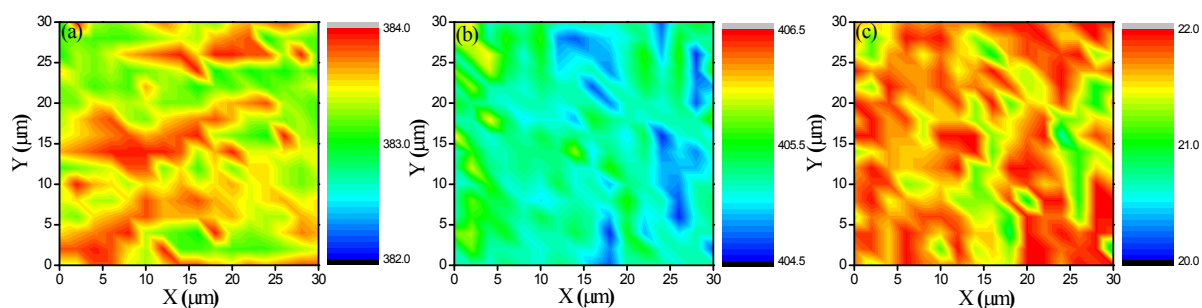

**Figure S1.** Raman mapping analysis were performed over an area of 30 μm × 30 μm of 2 nm thickness MoS<sub>2</sub> film (sputtered for 1 minute). **(a)** E<sub>2g</sub><sup>1</sup> mode mapping image is appeared at 382-384 cm<sup>-1</sup>; **(b)** A<sub>1g</sub> mode mapping image is appeared at 404.5 - 406.5 cm<sup>-1</sup>; **(c)** The measured frequencies difference (Δk) are in the range of 20 – 22 cm<sup>-1</sup>.

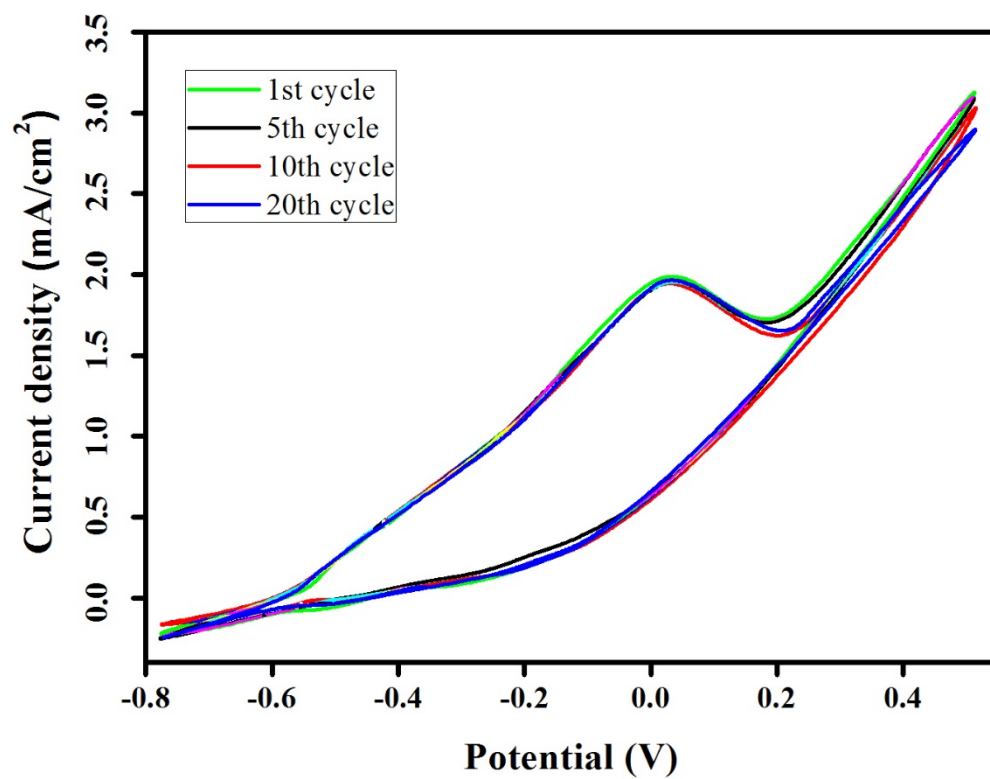

**Figure S2.** Cyclic voltammetry measurements of the Cu/MoS<sub>2</sub> (2 nm)/ITO hybrid.

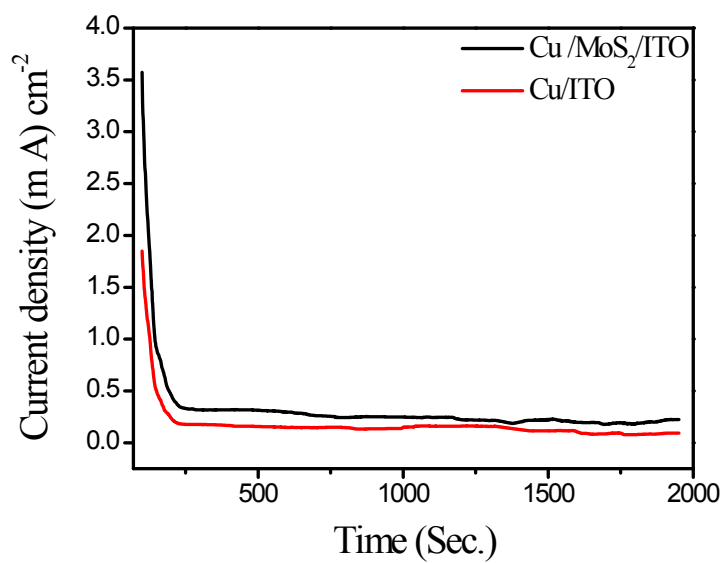

**Figure S3.** Chronoamperometric measurement in 75 mM NaOH with 0.1 mM hydrazine hydrate at -0.4 V (a) Cu/MoS<sub>2</sub>/ITO hybrid (Black line); (b) Cu/ITO hybrid (Red line).
